# Supplementary material
Source: HighWire-hosted journal article supplement (https://cmaj.ca/highwire/filestream/58351/field_highwire_adjunct_files/1/revisit-latino-2-at.pdf)
Supplement: revisit-latino-2-at.pdf [file revisit-latino-2-at.pdf]

**Appendix 2 (as supplied by the authors): Summary of cohort results published between 2007 and 2010 on alcohol drinking and the risk of upper aerodigestive tract, breast, colon–rectum and liver cancers**

| Country/Study<br>Cancer site              | Participants,<br>no. | Cases,<br>no. | Significantly increased risk<br>associated with alcohol<br>drinking* | Dose–<br>response<br><i>p</i> trend |
|-------------------------------------------|----------------------|---------------|----------------------------------------------------------------------|-------------------------------------|
| UK/Million Women Study <sup>1</sup>       |                      |               |                                                                      |                                     |
| Oral cavity and<br>pharynx                | 1 280 296            | 758           | Yes (women)†                                                         | <0.001§                             |
| Larynx                                    |                      | 138           | Yes (women)†                                                         | 0.008§                              |
| Oesophagus                                |                      | 773           | Yes (women)†                                                         | 0.002§                              |
| Breast                                    |                      | 28 380        | Yes (women)†                                                         | <0.001§                             |
| Colon                                     |                      | 4169          | No (women)†                                                          | 0.8§                                |
| Rectum                                    |                      | 2129          | Yes (women)†                                                         | 0.02§                               |
| Liver                                     |                      | 337           | Yes (women)†                                                         | 0.03§                               |
| Europe/EPIC <sup>2,3</sup>                |                      |               |                                                                      |                                     |
| UADT                                      | 271 253              | 392           | Yes†                                                                 | <0.001§                             |
| Breast                                    | 274 688              | 4285          | Yes (women)†                                                         | NA§                                 |
| USA/NIH-AARP <sup>4,5</sup>               |                      |               |                                                                      |                                     |
| Mouth, pharynx,<br>larynx                 | 492 960              | 794           | Yes†                                                                 | ≤ 0.001                             |
| Oesophagus                                | 474 606              | 97            | Yes†                                                                 | < 0.0001                            |
| The Netherlands/NLCS <sup>6,7</sup>       |                      |               |                                                                      |                                     |
| Oesophagus                                | 120 852              | 107           | Yes†                                                                 | < 0.001§                            |
| Colon-rectum                              | 120 852              | 2323          | Yes†                                                                 | NA                                  |
| Japan/JPHC Study <sup>8,9</sup>           |                      |               |                                                                      |                                     |
| Oesophagus                                | 44 970               | 215           | Yes (men)†                                                           | 0.001                               |
| Breast                                    | 50 757               | 572           | Yes (women)†                                                         | 0.036                               |
| Korea <sup>10</sup>                       |                      |               |                                                                      |                                     |
| Oesophagus                                | 782 632              | 1383          | Yes (men)†                                                           | NA                                  |
| USA/NHS <sup>11</sup>                     |                      |               |                                                                      |                                     |
| Oral cavity                               | 87 621               | 147           | Yes (women)†                                                         | NA                                  |
| China (Singapore) <sup>12</sup>           |                      |               |                                                                      |                                     |
| Oropharynx                                | 61 320               | 75            | Yes†                                                                 | < 0.0001                            |
| India <sup>13</sup>                       |                      |               |                                                                      |                                     |
| Oral cavity                               | 32 347               | 137           | Yes†                                                                 | 0.006                               |
| China/Shanghai Cohort Study <sup>14</sup> |                      |               |                                                                      |                                     |
| Oesophagus                                | 18 244               | 121           | Yes†                                                                 | < 0.0001                            |
| Taiwan <sup>15</sup>                      |                      |               |                                                                      |                                     |
| Oral cavity                               | 8356                 | 191           | No†                                                                  | NA                                  |
| USA/WHI-OS <sup>16,17</sup>               |                      |               |                                                                      |                                     |
| Breast (invasive)                         | 88 530               | 1783          | Yes (women)†                                                         | 0.009%                              |
| Breast (DCIS)                             | 63 822               | 489           | No (women)†                                                          | 0.44                                |
| USA/WHS <sup>18</sup>                     |                      |               |                                                                      |                                     |
| Breast                                    | 38 454               | 1484          | Yes (women)                                                          | 0.02§                               |

|                                                        |        |     |               |          |
|--------------------------------------------------------|--------|-----|---------------|----------|
| USA/VITAL Cohort Study <sup>19</sup>                   |        |     |               |          |
| Breast                                                 | 35 023 | 743 | Yes (women)   | < 0.0001 |
| Denmark/Danish Nurse Cohort Study <sup>20</sup>        |        |     |               |          |
| Breast                                                 | 17 647 | 457 | Yes (women)   | NA       |
| Denmark/CCHS <sup>21</sup>                             |        |     |               |          |
| Breast                                                 | 9318   | 476 | Yes (women) † | 0.001    |
| USA/Health Professionals Follow-up Study <sup>22</sup> |        |     |               |          |
| Colon-rectum                                           | 47 432 | 868 | Yes (men) †   | 0.0006§  |
| Japan/Miyagi Cohort Study <sup>23</sup>                |        |     |               |          |
| Colon-rectum                                           | 25 279 | 307 | Yes (men) †   | 0.0001   |
| UK/EPIC <sup>24</sup>                                  |        |     |               |          |
| Colon-rectum                                           | 24 244 | 407 | No†           | 0.14     |
| Korea/KEPEC Study <sup>25</sup>                        |        |     |               |          |
| Colon-rectum                                           | 14 304 | 112 | No            | NA       |
| Finland/KIDH Risk Factor Study <sup>26</sup>           |        |     |               |          |
| Colon-rectum                                           | 2682   | 59  | Yes†          | NA       |
| Taiwan/REVEAL-Hepatitis B virus Cohort <sup>27</sup>   |        |     |               |          |
| Liver                                                  | 2260   | 135 | Yes†          | NA       |

Note: DCIS = ductal carcinoma in situ; NA = not available; UADT = upper aerodigestive tract.

\*Adjusted for several confounders.

†Adjusted for several confounders including smoking.

§For each 10 grams per day increment of ethanol. Ten grams of ethanol are provided by 10 cL of wine 12% or champagne 12%, 25 cL of beer 5% or 3 cL of spirits 40%. In Canada, for example, it is less than one glass of wine (14.2 cL).

%For each gram per day increment of ethanol.

## References

1. Allen NE, Beral V, Casabonne D, et al. Moderate alcohol intake and cancer incidence in women. *J Natl Cancer Inst* 2009;101:296-305.
2. Weikert C, Dietrich T, Boeing H, et al. Lifetime and baseline alcohol intake and risk of cancer of the upper aero-digestive tract in the European prospective investigation into cancer and nutrition (EPIC) study. *Int J Cancer* 2009;125: 406-12.
3. Tjonneland A, Christensen J, Olsen A, et al. Alcohol intake and breast cancer risk: the European prospective investigation into cancer and nutrition (EPIC). *Cancer Causes Control* 2007;18:361-73.
4. Freedman ND, Schatzkin A, Leitzmann MF, et al. Alcohol and head and neck cancer risk in a prospective study. *Br J Cancer* 2007;96:1469-74.
5. Freedman ND, Abnet CC, Leitzmann MF, et al. A prospective study of tobacco, alcohol, and the risk of oesophageal and gastric cancer subtypes. *Am J Epidemiol* 2007;165:1424-33.
6. Bongaerts BWC, van den Brandt PA, Goldbohm RA, et al. Alcohol consumption, type of alcoholic beverage and risk of colorectal cancer at specific subsites. *Int J Cancer* 2008;123:2411-7.

7. Steevens J, Schouten LJ, Goldbohm RA, et al. Alcohol consumption, cigarette smoking and risk of subtypes of oesophageal and gastric cancer: a prospective cohort study. *Gut* 2010;59:39-48.
8. Ishiguro S, Sasazuki S, Inoue M, et al. Effect of alcohol consumption, cigarette smoking and flushing response on esophageal cancer risk: a population-based cohort study (JPH study). *Cancer Lett* 2009;275:240-6.
9. Suzuki R, Iwasaki M, Inoue M, et al. Alcohol consumption-associated breast cancer incidence and potential effect modifiers: the Japan public health center-based prospective study. *Int J Cancer* 2010;127:685-95.
10. Kimm H, Kim S, Jee SH. The independent effects of cigarette smoking, alcohol consumption, and serum aspartate aminotransferase on the alanine aminotransferase ratio in Korean men for the risk for esophageal cancer. *Yonsei Med J* 2010;51:310-7.
11. Shanmumgham JR, Zavras AI, Rosner BA, et al. Alcohol-folate interactions in the risk of oral cancer in women: a prospective cohort study. *Cancer Epidemiol Biomarkers Prev* 2010;19:2516-24.
12. Friberg JT, Yuan JM, Wang R, et al. A prospective study of tobacco and alcohol use as risk factors for pharyngeal carcinomas in Singapore Chinese. *Cancer* 2007;109:1183-91.
13. Cancela Mde C, Ramadas K, Favette JM, et al. Alcohol intake and oral cavity cancer risk among men in a prospective study in Kerala, India. *Community Dent Oral Epidemiol* 2009;37:342-9.
14. Fan Y, Yuan JM, Wang R, et al. Alcohol, tobacco and diet in relation to esophageal cancer: the Shanghai cohort study. *Nutr Cancer* 2008;60:354-63.
15. Yen TT, Lin WD, Wang CP, et al. The association of smoking, alcoholic consumption, betel quid chewing and oral cavity cancer: a cohort study. *Eur Arch Otorhinolaryngol* 2008;265:1403-7.
16. Duffy CM, Assaf A, Cyr M, et al. Alcohol and folate intake and breast cancer risk in the WHI observational study. *Breast Cancer Res Treat* 2009;116:551-62.
17. Kabat GC, Kim M, Shikany JM, et al. Alcohol consumption and risk of ductal carcinoma in situ of the breast in a cohort of postmenopausal women. *Cancer Epidemiol Biomarkers Prev* 2010;19:2066-72.
18. Zhang SM, Lee IM, Manson JE, et al. Alcohol consumption and breast cancer risk in the Women's Health Study. *Am J Epidemiol* 2007;165:667-76.
19. Maruti SS, Ulrich CM, White E. Folate and one-carbon metabolism nutrients from supplements and diet in relation to breast cancer risk. *Am J Clin Nutr* 2009;89:624-33.
20. Morch LS, Johansen D, Thygesen LC, et al. Alcohol drinking, consumption patterns and breast cancer among Danish nurses: a cohort study. *Eur J Public Health* 2007;17:624-9.
21. Thygesen LC, Morch LS, Keiding N, et al. Use of baseline and updated information on alcohol intake on risk for breast cancer: importance of latency. *Int J Epidemiol* 2008;37:669-77.
22. Thygesen LC, Wu K, Gronbaek M, et al. Alcohol intake and colorectal cancer. A comparison of approaches for including repeated measures of alcohol consumption. *Epidemiology* 2008;19:258-64.
23. Akhter M, Kuriyama S, Nakaya N, et al. Alcohol consumption is associated with an increased risk of distal colon and rectal cancer in Japanese men: the Miyagi Cohort Study. *Eur J Cancer* 2007;43:383-90.

Appendix to: Latino-Martel P, Arwidson P, Ancellin R et al. Alcohol consumption and cancer risk: revisiting guidelines for sensible drinking. *CMAJ* 2011. DOI:10.1503/cmaj110363.

24. Park JY, Mitrou PN, Dahm CC, et al. Baseline alcohol consumption, type of alcoholic beverage and risk of colorectal cancer in the European Prospective Investigation into Cancer and Nutrition-Norfolk study. *Cancer Epidemiol* 2009;33:347-54.
25. Lim HJ, Park BJJ. Cohort study on the association between alcohol consumption and the risk of colorectal cancer in the Korean elderly. *Prev Med Public Health* 2008;41:23-9.
26. Toriola AT, Kurl S, Laukanen JA, et al. Alcohol consumption and risk of colorectal cancer: the Findrink study. *Eur J Epidemiol* 2008;23:395-401.
27. Loomba R, Yang HI, Su J, et al. Obesity and alcohol synergize to increase the risk of incident hepatocellular carcinoma in men. *Clin Gastroenterol Hepatol* 2010;8:891-8.
